# Supplementary material
Source: Research Square preprint supplement (doi:10.21203/rs.3.rs-10187303/v1)
Supplement: Supplementary file 1 [file 9219989f2788bd43dc96a8da.docx]

**Table 1.** Socio-demographic data of the participants (n = 234)

| **Variable** | **Mean ± SD** | **Min. - Max.** |
| --- | --- | --- |
| **Age (years)** | 50.26 ± 9.79 | *32 - 79* |
| **Variable** | ***n*** | ***%*** |
| **Employment Status** |  |  |
| Employed | 86 | 36.8 |
| Unemployed / Retired | 148 | 63.2 |
| **Marital Status** |  |  |
| Married | 31 | 13.2 |
| Single | 203 | 86.8 |
| **Educational Level** |  |  |
| Literate | 42 | 17.9 |
| Middle school | 34 | 14.5 |
| High School | 123 | 52.6 |
| University and above | 35 | 15.0 |
| **Income level** |  |  |
| Income less than expenses | 7 | 3.0 |
| Income equals expenses | 175 | 74.8 |
| Income greater than expenses | 52 | 22.2 |
| **Living Arrangement1** |  |  |
| Lives alone | 19 | 8.1 |
| Lives with partner | 204 | 87.2 |
| Lives with children | 84 | 35.9 |
| Lives with parents | 14 | 6.0 |
| **Diagnosis** |  |  |
| Breast Cancer | 176 | 75.2 |
| Ovarian Cancer | 36 | 15.4 |
| Cervical Cancer | 10 | 4.3 |
| Endometrial Malignant Neoplasm | 12 | 5.1 |
| **Disease Stage** |  |  |
| Stage I | 24 | 10.3 |
| Stage II | 97 | 41.5 |
| Stage III | 90 | 38.5 |
| Stage IV | 23 | 9.8 |
| **Metastasis** |  |  |
| Present | 105 | 44.9 |
| Absent | 129 | 55.1 |
| **Previous Treatments Received 1** |  |  |
| Surgery | 192 | 82.1 |
| Radiotherapy | 148 | 63.2 |
| Chemotherapy | 206 | 88.0 |
| **Chemotherapy Cycle Frequency** |  |  |
| q7 | 17 | 7.3 |
| q15 | 26 | 11.1 |
| q21 | 147 | 62.8 |
| q28 | 16 | 6.9 |
| **Treatment-Related Side Effects** |  |  |
| Yes | 89 | 38.0 |
| No | 145 | 62.0 |

1Multiple selections possible. 2q: Number of days between chemotherapy cycles

**Table 2**. Edmonton Symptom Assessment Scale (ESAS) Scores (n = 234)

| Variables | **Mean** | **SD** | **Min.** | **Max.** |
| --- | --- | --- | --- | --- |
| Tiredness | 7.88 | 1.83 | .00 | 10.00 |
| Anxiety | 7.45 | 1.98 | .00 | 10.00 |
| Pain | 7.44 | 1.696 | .00 | 10.00 |
| Depression | 7.09 | 2.01 | .00 | 10.00 |
| Drowsiness | 7.06 | 2.17 | 1.00 | 10.00 |
| Nausea | 5.94 | 2.14 | .00 | 10.00 |

**Table 3.** Financial Toxicity Scale, Short-Form Supportive Care Needs Survey Questionnaire, and Distress Thermometer Scores (n = 234)

| **Scales And Subscales** | **Mean ± SD** | **Min-Max*** |
| --- | --- | --- |
| **Financial Toxicity Scale Total Score** | 20.34 ± 6.94 | 0-44 |
| **Short-Form Supportive Care Needs Survey Questionnaire Total Score** | 94.56 ± 18.22 | 29-145 |
| Health Care Service and Informing | 43.59 ± 9.37 | 14-70 |
| Daily Life | 18.69 ± 3.53 | 5-25 |
| Sexuality | 7.17 ± 2.76 | 3-15 |
| Psychology | 25.16 ± 5.76 | 7-35 |
| **Distress Thermometer Total Score** | 7.16 ± 1.88 | 0-10 |

* Minimum and Maximum score of the scales

**Table 4.** Patients’ Unmet Needs (n = 234)

| **Daily Life Problems** | **Yes** | **No** | **Physical Problems** | **Yes** | **No** |
| --- | --- | --- | --- | --- | --- |
| Childcare | 58 (24.8) | 176 (75.2) | Body image | 93 (39.7) | 141 (60.3) |
| Meals | 69 (29.5) | 165 (70.5) | Bathing/Dressing | 40 (17.1) | 194 (82.9) |
| Housing | 14 (6.0) | 220 (94.0) | Shortness of breath | 43 (18.4) | 191 (81.6) |
| Social Security | 23 (9.8) | 211 (90.2) | Urinary problems | 25 (10.7) | 209 (89.3) |
| Transportation | 94 (40.2) | 140 (59.8) | Constipation/Diarrhea | 73 (31.2) | 161 (68.8) |
| Work/School | 70 (29.9) | 164 (70.1) | Eating | 37 (15.8) | 197 (84.2) |
| Treatment Decisions | 67 (28.6) | 167 (71.4) | Fatigue | 192 (82.1) | 42 (17.9) |
|  | | | Bloating | 47 (20.1) | 187 (79.9) |
| **Family Problems** | **Yes** | **No** | Fever | 23 (9.8) | 211 (90.2) |
| Partner | 34 (14.5) | 200 (85.5) | Mobility / Walking | 10 (4.3) | 224 (95.7) |
| Children | 60 (25.6) | 174 (74.4) | Indigestion | 18 (7.7) | 216 (92.3) |
| Fertility / Ability to have children | 18 (7.7) | 216 (92.3) | Memory / Concentration | 32 (13.7) | 202 (86.3) |
| Family health issues | 120 (51.3) | 114 (48.7) | Mucositis | 26 (11.1) | 208 (88.9) |
|  | | | Nausea | 111 (47.4) | 123 (52.6) |
| **Emotional Problems** | **Yes** | **No** | Nasal congestion | 52 (22.2) | 182 (77.8) |
| Depression | 66 (28.2) | 168 (71.8) | Pain | 219 (93.6) | 15 (6.4) |
| Fears | 97 (41.5) | 137 (58.5) | Sexual problems | 51 (21.8) | 183 (78.2) |
| Irritability | 108 (46.2) | 126 (53.8) | Dry/itchy skin | 89 (38.0) | 145 (62.0) |
| Sadness | 156 (66.7) | 78 (33.3) | Sleep | 141 (60,3) | 93 (39,7) |
| Anxiety | 191 (81.6) | 43 (18.4) | Substance (drug) use | 14 (6.0) | 220 (94.0) |
| Loss of interest in usual activities | 173 (73.9) | 61 (26.1) | Tingling in hands/feet | 100 (42.7) | 134 (57.3) |
|  | | |  | | |
| **Faith-Related Problems** | 51 (21.8) | 183 (78.2) |

**Table 5.** Correlations Between Financial Toxicity Scale, Distress Thermometer Scores, and Short-Form Supportive Care Needs Survey Total and Subscale Scores (n = 234)

|  | | **Financial Toxicity Scale Total Score** | **Distress Thermometer Total Score** | **Supportive Care Needs Survey Questionnaire Total Score** | **Health Care Service and Informing** | **Daily Life** | **Sexuality** |
| --- | --- | --- | --- | --- | --- | --- | --- |
| **Financial Toxicity Scale Total Score** | r | 1 | -.363** | -.305** |  |  |  |
| p |  | .000 | .000 |  |  |  |
| **Distress Thermometer Total Score** | r | -.363** | 1 | .593** |  |  |  |
| p | .000 |  | .000 |  |  |  |
| **Supportive Care Needs Survey Questionnaire Total Score** | r | -.305** | .593** | 1 |  |  |  |
| p | .000 | .000 |  |  |  |  |
| **Health Care Service and Informing** | r | -.222** | .458** | .927** | 1 |  |  |
| p | .001 | .000 | .000 |  |  |  |
| **Daily Life** | r | -.304** | .676** | .769** | .573** | 1 |  |
| p | .000 | .000 | .000 | .000 |  |  |
| **Sexuality** | r | -.245** | .211** | .576** | .478** | .231** | 1 |
| p | .000 | .001 | .000 | .000 | .000 |  |
| **Psychology** | r | -.304** | .617** | .904** | .724** | .778** | .425** |
| p | .000 | .000 | .000 | .000 | .000 | .000 |
